## EFFECT OF $\gamma$ -AMINOBUTYRIC ACID ON INTRACELLULAR pH IN THE CRAYFISH STRETCH-RECEPTOR NEURONE

BY J. VOIPIO<sup>1</sup>, M. PASTERNAK<sup>1</sup>, B. RYDQVIST<sup>2</sup> AND K. KAILA<sup>1</sup>

<sup>1</sup>*Department of Zoology, Division of Physiology, University of Helsinki, Arkadiankatu 7, SF-0100 Helsinki, Finland and*

<sup>2</sup>*Department of Physiology, Karolinska Institute, S-104 01 Stockholm, Sweden*

*Accepted 28 September 1990*

### Summary

The effect of  $\gamma$ -aminobutyric acid (GABA) on intracellular pH (pHi) was examined in the crayfish stretch-receptor neurone using  $H^+$ -selective microelectrodes and a two-microelectrode voltage clamp. In the presence of  $30 \text{ mmol l}^{-1} \text{ HCO}_3^-$  (pH 7.4), application of GABA ( $0.5 \text{ mmol l}^{-1}$ ) produced a mean fall in pHi of 0.26 units. The initial rate of fall of pHi was attributable to a net influx of acid equivalents of  $6.3 \text{ mmol l}^{-1} \text{ min}^{-1}$ . In the nominal absence of  $\text{HCO}_3^-$ , GABA had little effect on pHi. The  $\text{HCO}_3^-$ -dependent acidosis caused by GABA was inhibited by picrotoxin ( $0.1 \text{ mmol l}^{-1}$ ) but not by depletion of extracellular and intracellular  $\text{Cl}^-$ . Acetazolamide ( $0.1 \text{ mmol l}^{-1}$ ) decreased the rate of fall of pHi caused by a step increase in  $\text{CO}_2$  partial pressure as well as by GABA, which indicates that the neurone contains carbonic anhydrase. In the presence of both  $\text{Cl}^-$  and  $\text{HCO}_3^-$ , the reversal potential of the GABA-activated current was more positive than under nominally  $\text{HCO}_3^-$ -free conditions. In line with this, GABA induced a marked  $\text{HCO}_3^-$ -dependent depolarization, and this depolarizing action was enhanced in the absence of  $\text{Cl}^-$  so as to lead to triggering of action potentials. All these observations support the conclusion that the GABA-induced fall in pHi is due to a net efflux of  $\text{HCO}_3^-$  through the inhibitory anion channels.

### Introduction

An extensive amount of work has shown that an increase in  $\text{Cl}^-$  conductance plays a dominant role in synaptic inhibition mediated by GABA in invertebrate neurones as well as in vertebrate neurones with  $\text{GABA}_A$ -type receptors (Boistel and Fatt, 1958; Takeuchi and Takeuchi, 1967; for reviews, see Atwood, 1982; Siggins and Gruol, 1986). In line with this, a widely accepted assumption is that the reversal potential of the GABA-induced current ( $E_{\text{GABA}}$ ) is identical to the equilibrium potential of  $\text{Cl}^-$  ( $E_{\text{Cl}}$ ). However, work on both invertebrate (Kaila and Voipio, 1987; Kaila *et al.* 1989*b*, 1990) and vertebrate preparations (Kelly *et al.* 1969; Inomata *et al.* 1986; Bormann *et al.* 1987) has indicated that GABA-gated

**Key words:**  $\gamma$ -aminobutyric acid, intracellular pH, inhibitory channel, bicarbonate permeability, *Astacus astacus*.

anion channels are significantly permeable to  $\text{HCO}_3^-$ . We have recently shown that, in crayfish leg opener muscle fibres in the presence of  $30 \text{ mmol l}^{-1} \text{HCO}_3^-$ ,  $E_{\text{GABA}}$  is up to 15 mV more positive than  $E_{\text{Cl}}$ . The difference between  $E_{\text{GABA}}$  and  $E_{\text{Cl}}$  was accounted for by a  $\text{HCO}_3^-/\text{Cl}^-$  permeability ratio of about 0.3 (Kaila *et al.* 1989b). In agreement with the significant  $\text{HCO}_3^-$  permeability of the inhibitory anion channels, GABA was also found to induce a large fall in intracellular pH (pHi) (Kaila and Voipio, 1987; Kaila *et al.* 1990).

In view of the central role of the crayfish stretch-receptor neurone in the experimental work which has led to the clarification of the basic mechanisms underlying GABA-mediated inhibition (Kuffler and Eyzaguirre, 1955; Kuffler and Edwards, 1958; Roberts, 1986), we found it important to examine whether the effect of GABA on the neurone is influenced by  $\text{HCO}_3^-$  in a manner similar to that observed in the opener muscle fibre. More specifically, such a comparative investigation is motivated by the following facts. First, it has become increasingly evident that, even within a single animal species, the GABA-gated receptor-channel complex exhibits considerable variation in its properties (Dudel and Hatt, 1976; Yasui *et al.* 1985; Levitan *et al.* 1988). Second, the fall in pHi caused by the efflux of  $\text{HCO}_3^-$  through inhibitory anion channels is governed by factors such as the relative density of the channels on the cell membrane and the steepness of the dependence on pHi of the active acid extrusion mechanisms of the GABA-sensitive cell (Kaila *et al.* 1990). Clearly, not all the above factors are likely to be identical in the opener muscle fibre and the stretch-receptor neurone of the crayfish and, therefore, the possible existence of a significant GABA-induced acid load and its consequences on pHi regulation in the neurone cannot be deduced from results obtained on the muscle alone.

In this work, we have examined the influence of  $\text{HCO}_3^-$  on the actions of GABA on membrane potential and on pHi in the slowly adapting stretch-receptor neurone of the crayfish with the aid of conventional and  $\text{H}^+$ -selective microelectrodes. The results indicate a significant  $\text{HCO}_3^-$  permeability of GABA-gated channels which has a marked influence on both the electrical behaviour and pHi regulation of the neurone.

### Materials and methods

The experiments were carried out on the slowly adapting stretch-receptor neurone of the crayfish *Astacus astacus* L. The stretch receptor with its muscle was isolated as described previously (Brown *et al.* 1978). The preparation was pinned on the bottom of a flow-through chamber, which was perfused at a rate of about  $2.5 \text{ ml min}^{-1}$  and earthed with an agar/ $3 \text{ mol l}^{-1}$  KCl bridge. The volume of this chamber was about  $300 \mu\text{l}$ . All experiments were carried out at room temperature ( $20\text{--}21^\circ\text{C}$ ). The input resistance of the neurones used in the present experiments ranged from 1.6 to  $3 \text{ M}\Omega$  and they had action potentials with an overshoot of 10–20 mV.

*Measurement of membrane potential and of  $E_{GABA}$* 

Dry-bevelled microelectrodes (Kaila and Voipio, 1985) filled with  $0.62 \text{ mol l}^{-1} \text{ K}_2\text{SO}_4$  and  $8.0 \text{ mmol l}^{-1} \text{ KCl}$  were used for measuring membrane potential and passing current. They had a resistance of 15–40 M $\Omega$ . The reversal potential of the GABA-activated current ( $E_{GABA}$ ) was measured using a two-microelectrode voltage clamp and short pulses of GABA ( $0.5 \text{ mmol l}^{-1}$ ).

*Ion-selective microelectrodes*

$\text{H}^+$ -selective microelectrodes were constructed and calibrated as described previously (Kaila *et al.* 1989a,b). Briefly, dry-bevelled micropipettes pulled from tubing without a fibre (GC150, Clark Electromedical) were silanised and back-filled with  $100 \text{ mmol l}^{-1} \text{ NaCl}$  plus  $20 \text{ mmol l}^{-1}$  Hepes (pH 7.6). A short column of the  $\text{H}^+$  sensor Fluka 82500 was drawn into the tip. In a few experiments, the  $\text{H}^+$ -selective microelectrodes were made using non-bevelled micropipettes pulled from thin-walled tubing (GC150T, Clark Electromedical). The resistance of these electrodes was about 70–100 G $\Omega$ . A few measurements of the rate of depletion of intracellular  $\text{Cl}^-$  in a chloride-free solution were made using  $\text{Cl}^-$ -selective microelectrodes fabricated in the above manner (sensor, Corning 477913; resistance, 10 G $\Omega$ ).

*Solutions*

The nominally  $\text{CO}_2/\text{HCO}_3^-$ -free crayfish saline contained (in  $\text{mmol l}^{-1}$ ): NaCl, 207; KCl, 5.4;  $\text{CaCl}_2$ , 7.0;  $\text{MgCl}_2$ , 2.6; Hepes, 10 (pH 7.4; adjusted with NaOH). In making  $\text{HCO}_3^-$ -containing solutions,  $30 \text{ mmol l}^{-1} \text{ NaCl}$  was replaced by an equivalent amount of  $\text{NaHCO}_3$  to yield a pH of 7.4 when equilibrated with air or oxygen containing 5%  $\text{CO}_2$ .  $\text{Cl}^-$ -free solutions were made by isomolar substitution of  $\text{Cl}^-$  by methanesulphonate, or, when using  $\text{Cl}^-$ -selective microelectrodes, by glucuronate with the  $\text{Ca}^{2+}$  concentration elevated to  $17.5 \text{ mmol l}^{-1}$  (see Kaila *et al.* 1989b). GABA (Sigma) was added from a stock solution made up in water. Acetazolamide (Sigma) and picrotoxin (Sigma) were directly dissolved into the saline.

*Calculation of net fluxes and intracellular concentrations of  $\text{HCO}_3^-$* 

The GABA-induced net  $\text{HCO}_3^-$  efflux ( $J_{\text{HCO}_3}^e$ ;  $\text{mmol l}^{-1} \text{ min}^{-1}$ ) was obtained from (see Kaila *et al.* 1990):

$$J_{\text{HCO}_3}^e = J_{\text{H}}^i = -\beta \text{d}p\text{H}/\text{d}t, \quad (1)$$

where  $J_{\text{H}}^i$  is the net influx of acid equivalents,  $\beta$  is the intracellular  $\text{H}^+$  buffering power of the neurone and  $t$  is time. In the presence of  $\text{CO}_2$ ,  $\beta$  is the sum of the non- $\text{CO}_2$  buffering power (assumed to be  $10 \text{ mmol l}^{-1}$ ; Szatkowski and Thomas, 1989) and of the  $\text{CO}_2/\text{HCO}_3^-$  buffering power which is  $2.3[\text{HCO}_3^-]_i$  (see Roos and

Boron, 1981). The intracellular  $\text{HCO}_3^-$  concentration ( $[\text{HCO}_3^-]_i$ ) was obtained from:

$$[\text{HCO}_3^-]_i = 10^{(\text{pHi} - \text{pHe})} [\text{HCO}_3^-]_e, \quad (2)$$

where pHe is the extracellular pH.

#### Statistics

All values are given as mean  $\pm$  s.e.m.

### Results

#### *Effect of GABA on membrane potential and on intracellular pH*

In a nominally  $\text{HCO}_3^-$ -free solution, exposure of the stretch-receptor neurone to a near-saturating concentration of GABA ( $0.5 \text{ mmol l}^{-1}$ ) produced a change in membrane potential ( $E_m$ ) of  $+3.2 \pm 0.67 \text{ mV}$  ( $N=14$ ). A hyperpolarizing response was seen in only one of the preparations examined. This observation is in agreement with previous results (e.g. Ozawa and Tsuda, 1973), which report both depolarizing and hyperpolarizing responses upon application of GABA. We did not find any correlation between the type of response (depolarizing/hyperpolarizing) and the various criterion parameters (cell input resistance, action potential overshoot, etc.) which have often been used as indices of cell viability (Deisz and Lux, 1982). The small GABA-induced depolarization observed in the absence of bicarbonate was paralleled by a very slight fall in pHi ( $0.027 \pm 0.006$  units;  $N=7$ ).

As illustrated in Fig. 1, exposure of the preparation to a solution containing  $30 \text{ mmol l}^{-1} \text{HCO}_3^-$  induced a rapid fall in pHi which recovered promptly close to the original baseline level. Application of GABA at this stage produced a depolarization of  $9.6 \pm 0.78 \text{ mV}$  ( $N=7$ ), which was much larger than that seen in the absence of  $\text{HCO}_3^-$ . The depolarization was now associated with a fall in pHi of up to 0.3 units (mean  $0.26 \pm 0.02$ ;  $N=7$ ). Both effects of GABA were fully reversible.

The initial net influx of acid equivalents caused by exposure to GABA, as well as the steady-state flux which takes place at plateau acidosis, were calculated using equation 1. The steady-state flux was estimated on the basis of the rate of change of pHi measured upon removal of GABA after attainment of plateau acidosis (see Kaila *et al.* 1990). These measurements yielded a value of  $6.3 \pm 0.31 \text{ mmol l}^{-1} \text{ min}^{-1}$  ( $N=7$ ) for the initial acid load and  $1.6 \pm 0.15 \text{ mmol l}^{-1} \text{ min}^{-1}$  ( $N=6$ ) for the steady-state acid load in the presence of  $\text{HCO}_3^-$ . The slight GABA-induced fall in pHi seen under nominally  $\text{HCO}_3^-$ -free conditions was attributable to an initial acid load of only about  $0.06\text{--}0.08 \text{ mmol l}^{-1} \text{ min}^{-1}$ .

#### *Effects of GABA in the absence of $\text{Cl}^-$*

Experiments of the kind shown in Fig. 1A do not provide information on the behaviour of  $\text{Cl}^-$  during the application of GABA. Therefore, one might argue that the effect of GABA on pHi is due to a redistribution of  $\text{Cl}^-$  which acts on

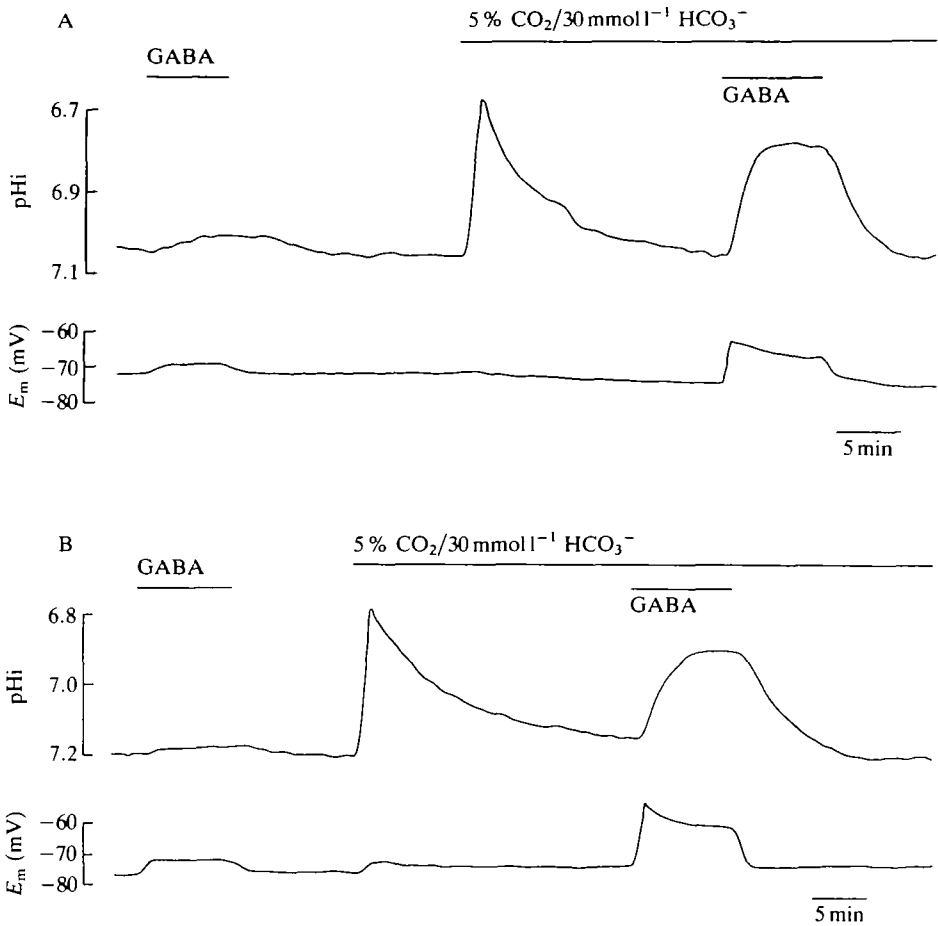

Fig. 1. (A) Dependence on  $\text{HCO}_3^-$  ( $30 \text{ mmol l}^{-1}$ ) of the fall in  $\text{pH}_i$  caused by GABA ( $0.5 \text{ mmol l}^{-1}$ ). Note the enhancement of the GABA-induced depolarization in the presence of  $\text{HCO}_3^-$ . (B) Absence of an influence of  $\text{Cl}^-$  depletion on the  $\text{HCO}_3^-$ -dependent acidotic effect of GABA ( $0.5 \text{ mmol l}^{-1}$ ). The preparation had been kept for 25 min in a  $\text{Cl}^-$ -free solution before the start of the recording.  $E_m$ , membrane potential.

$\text{Na}^+$ -dependent  $\text{Cl}^-/\text{HCO}_3^-$  exchange (Thomas, 1977; Moody, 1981), thereby affecting  $\text{pH}_i$ . This possibility was examined by studying the effects of GABA in the absence of both extracellular and intracellular  $\text{Cl}^-$ .

Measurements with  $\text{Cl}^-$ -selective microelectrodes indicated that, upon exposure of the neurone to a  $\text{Cl}^-$ -free solution, the intracellular  $\text{Cl}^-$  activity fell in a roughly exponential manner with a time constant of about 3.5–4.5 min. This means that a virtually complete depletion of  $\text{Cl}^-$  could be achieved in about 20 min. Accordingly, the preparation was exposed to a  $\text{Cl}^-$ -free solution for about 20–30 min before the effects of GABA were examined. As shown in the initial part of Fig. 1B, GABA had little effect on  $\text{pH}_i$  in the absence of both  $\text{Cl}^-$  and  $\text{HCO}_3^-$ .

However, in a  $\text{Cl}^-$ -free,  $\text{HCO}_3^-$ -containing solution, application of GABA produced a large fall in pHi.

In the absence of both  $\text{Cl}^-$  and  $\text{HCO}_3^-$ , GABA produced only a relatively small depolarization. The depolarizing effect of GABA was dramatically augmented in a solution containing  $\text{HCO}_3^-$  but no  $\text{Cl}^-$ , and it was usually big enough (20 mV or more) to trigger a train of action potentials (see Fig. 2B).

The above results indicate that the acid load induced by GABA is independent of  $\text{Cl}^-/\text{HCO}_3^-$  exchange. A similar conclusion applies to the opener muscle (Kaila *et al.* 1990).

An interesting observation made in the above experiments was that the recovery of pHi following a  $\text{CO}_2$ -induced or GABA-induced acidosis was not blocked in the absence of  $\text{Cl}^-$ . This clearly indicates that acid extrusion in the crayfish stretch-receptor neurone is not solely due to  $\text{Na}^+$ -dependent  $\text{Cl}^-/\text{HCO}_3^-$  exchange, as has been claimed (Moser, 1985).

#### *Effect of picrotoxin*

Picrotoxin (PTX) is a non-competitive inhibitor of crayfish GABA-gated anion channels (Takeuchi and Takeuchi, 1969; Aickin *et al.* 1981). As shown in Fig. 2A,  $0.1 \text{ mmol l}^{-1}$  PTX has a strong blocking effect on both the depolarization and the acidosis produced by  $0.5 \text{ mmol l}^{-1}$  GABA in a  $\text{HCO}_3^-$ -containing solution. PTX exerts its inhibitory effect whether  $\text{Cl}^-$  is present or not (Fig. 2B). These results further support the view that the  $\text{HCO}_3^-$ -dependent fall in pHi caused by GABA is due to a net efflux of  $\text{HCO}_3^-$  through the inhibitory postsynaptic channels.

#### *Effect of acetazolamide*

As has been explained in detail elsewhere (Kaila *et al.* 1990), a channel-mediated net efflux of  $\text{HCO}_3^-$  leads to a net transmembrane influx of  $\text{CO}_2$ . The acidifying effect of this influx depends on the hydration of  $\text{CO}_2$  (Roos and Boron, 1981), a reaction which in several types of cells is catalyzed by the enzyme carbonic anhydrase (Maren, 1967; Deutsch, 1987).

To determine whether carbonic anhydrase is present in the stretch-receptor neurone, the cell was exposed to the  $\text{CO}_2/\text{HCO}_3^-$ -containing solution under control conditions and in the presence of the carbonic anhydrase inhibitor acetazolamide ( $0.1 \text{ mmol l}^{-1}$ ). Owing to the rapid transmembrane equilibration of  $\text{CO}_2$  (see Fig. 1A,B), experiments of this kind are well-suited for detection of the presence of an intracellular carbonic anhydrase. Acetazolamide caused a marked decrease in the initial rate of fall of pHi seen in these experiments (Fig. 3A).

Acetazolamide also slowed down the initial rate of the GABA-induced acidosis by  $28 \pm 6.2\%$  ( $N=4$ ) (Fig. 3B). This indicates that, in the absence of intracellular carbonic anhydrase activity, the acidosis caused by  $0.5 \text{ mmol l}^{-1}$  GABA is rate-limited by the hydration of  $\text{CO}_2$  and not by the  $\text{HCO}_3^-$  conductance. A similar conclusion was made in previous work on crayfish muscle fibres (Kaila *et al.* 1990).

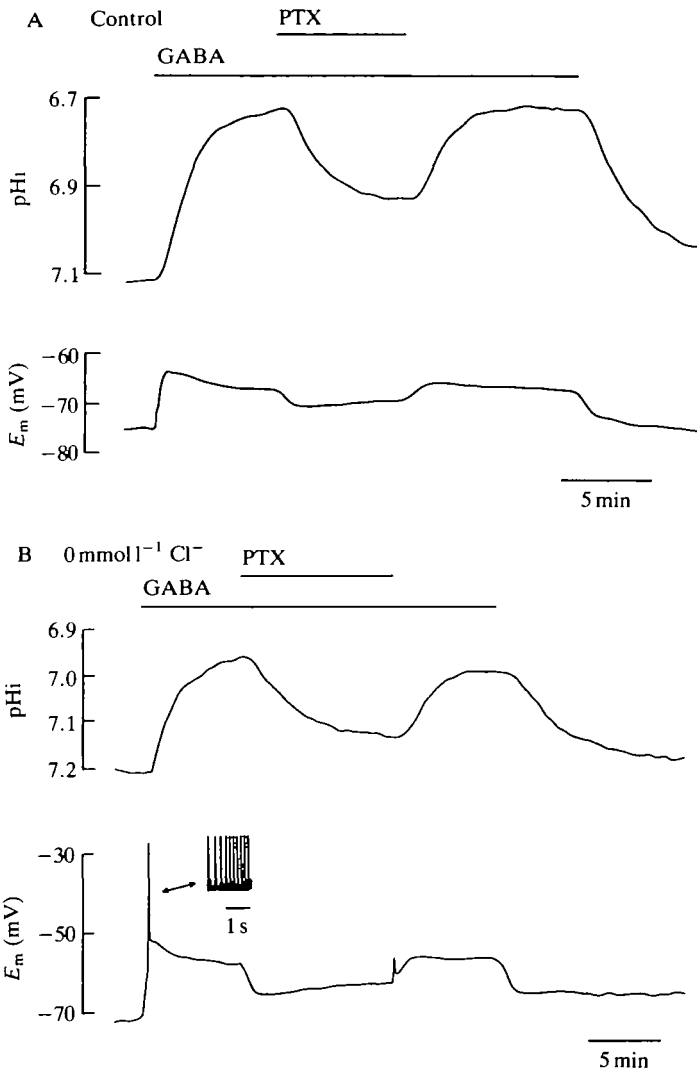

Fig. 2. Inhibition by picrotoxin (PTX,  $0.1 \text{ mmol l}^{-1}$ ) of the  $\text{HCO}_3^-$ -dependent acidosis and depolarization caused by GABA ( $0.5 \text{ mmol l}^{-1}$ ) in the presence (A) and absence (B) of  $\text{Cl}^-$ . In B, the preparation had been kept for 30 min in a  $\text{Cl}^-$ -free solution before exposure to GABA ( $0.5 \text{ mmol l}^{-1}$ ). Owing to the limited bandwidth of the membrane potential recording, the train of truncated action potentials (inset), which are triggered by GABA in the presence of  $\text{HCO}_3^-$ , is seen as a transient depolarizing deflection.

#### *Influence of bicarbonate on $E_{\text{GABA}}$*

The above results are in agreement with the idea that the GABA-induced fall in pH<sub>i</sub> is caused by a net efflux of  $\text{HCO}_3^-$  mediated by the inhibitory postsynaptic channels. Measurements of the voltage-dependence of the GABA-activated current showed that, in the presence of  $30 \text{ mmol l}^{-1} \text{HCO}_3^-$ ,  $E_{\text{GABA}}$  was about

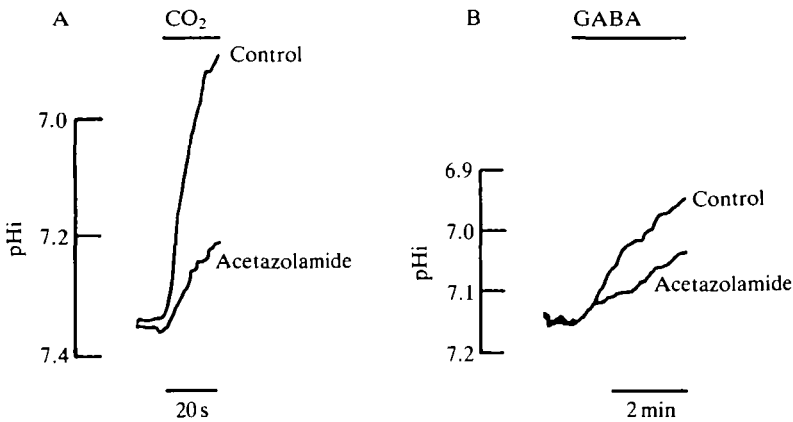

Fig. 3. Effect of  $0.1 \text{ mmol l}^{-1}$  acetazolamide on the fall in  $\text{pHi}$  induced by application of (A)  $\text{CO}_2/\text{HCO}_3^-$  and (B)  $0.5 \text{ mmol l}^{-1}$  GABA in the presence of  $\text{HCO}_3^-$ .

$6\text{--}9 \text{ mV}$  ( $N=3$ ) more positive than in the absence of bicarbonate (Fig. 4). This  $\text{HCO}_3^-$ -dependent positive shift in  $E_{\text{GABA}}$  is consistent with a significant bicarbonate permeability of the GABA-activated channels.

### Discussion

The present work shows that the postsynaptic inhibitory channels of the crayfish stretch-receptor neurone are significantly permeable to  $\text{HCO}_3^-$ . It will be of interest to see whether future work on other transmitter-sensitive neuronal anion channels, such as those gated by acetylcholine (Tauc and Gerschenfeld, 1962) and by glutamate (Marder and Paupardin-Tritsch, 1978) will reveal a significant role for  $\text{HCO}_3^-$  as a carrier of inhibitory currents.

Active regulation of intracellular pH leads to a non-equilibrium transmembrane distribution of  $\text{H}^+$ , such that the equilibrium potential of  $\text{H}^+$  ( $E_{\text{H}}$ ) is much more positive than the resting membrane potential (Roos and Boron, 1981; Thomas, 1984). In the presence of  $\text{CO}_2/\text{HCO}_3^-$ , the equilibrium potential of  $\text{HCO}_3^-$  is equal to that of protons, i.e.  $E_{\text{HCO}_3^-} = E_{\text{H}}$  (Kaila and Voipio, 1990). Therefore, a significant  $\text{HCO}_3^-$  permeability of the GABA-gated channels is expected to lead to a shift in  $E_{\text{GABA}}$  towards more positive potentials, as was observed in the present work. This shift cannot be due to a redistribution of  $\text{Cl}^-$  caused by an action of  $\text{CO}_2/\text{HCO}_3^-$  on  $\text{Na}^+$ -dependent  $\text{Cl}^-/\text{HCO}_3^-$  exchange (Thomas, 1977), because, if anything, such an effect would cause a decrease in intracellular  $\text{Cl}^-$  concentration and thereby a negative shift in  $E_{\text{GABA}}$ .

The  $\text{HCO}_3^-$  permeability also explains the marked fall in  $\text{pHi}$  caused by GABA in a solution equilibrated with 5%  $\text{CO}_2$ . A fall in  $\text{pHi}$  due to the efflux of  $\text{HCO}_3^-$  across transmitter-sensitive anion channels has previously been observed in the crayfish opener muscle (Kaila and Voipio, 1987; Kaila *et al.* 1990) and in the acinar cells of mammalian salivary glands (Melvin *et al.* 1988; Brown *et al.* 1989). In the



Aii GABA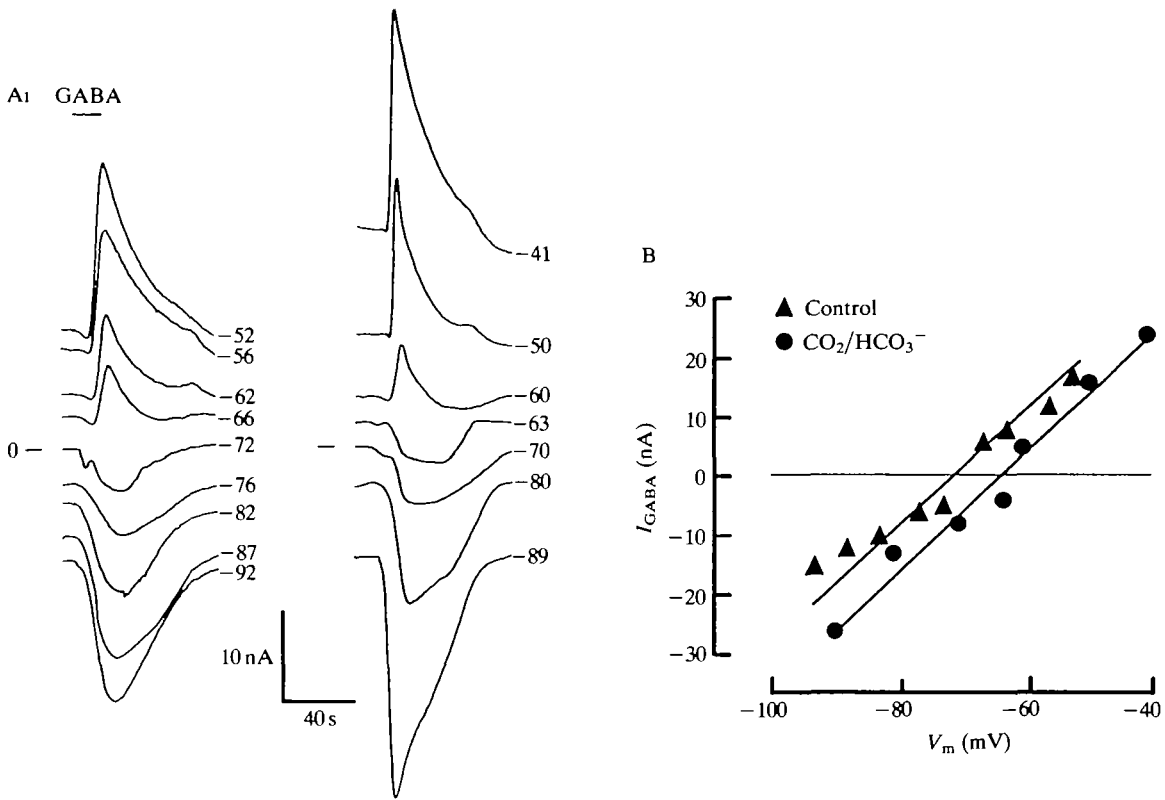

Fig. 4. Influence of  $HCO_3^-$  on  $E_{GABA}$ . (A) Specimen recordings of GABA-activated currents at various holding potentials in the absence (i) and presence (ii) of  $HCO_3^-$ . The holding potential (in mV) is indicated on the original recordings. (B) Dependence on holding potential ( $V_m$ ) of peak currents ( $I_{GABA}$ ) activated by GABA in control solution (▲) and in the presence of  $HCO_3^-$  (●).

present context, it is of interest that glutamate agonists (*N*-methyl-D-aspartate, quisqualate and kainate) have been shown to induce a fall in pHi in frog motoneurons (Endres *et al.* 1986). However, the mechanism underlying the acidotic action of glutamate agonists has not yet been clarified.

Because an open  $CO_2/HCO_3^- H^+$ -buffer system operates within the neurone, the GABA-induced efflux of  $HCO_3^-$  gives rise to an equivalent influx of acid (see equation 1). Despite the obvious structural and functional differences between the stretch-receptor neurone and the opener muscle fibre, which has been studied previously (Kaila *et al.* 1990), it is evident that, in the presence of  $HCO_3^-$ , GABA produces an instantaneous  $HCO_3^-$  efflux which is surprisingly similar in these two kinds of cells. It is slightly smaller in the neurone ( $6.3 \text{ mmol l}^{-1} \text{ min}^{-1}$ ) than in the muscle ( $8.0 \text{ mmol l}^{-1} \text{ min}^{-1}$ ). Likewise, the fall in pHi caused by GABA in the

neurone was somewhat smaller (0.26 units) than in the muscle (0.43 units). However, it is worth pointing out here that this kind of between-cells correlation of the two parameters is not obligatory, i.e. a smaller acidosis is not necessarily linked to a smaller acid load. This is because, at steady state, the fall in pHi produced by GABA is determined by the net efflux of  $\text{HCO}_3^-$  through the inhibitory channels as well as by the net efflux of acid equivalents mediated by plasmalemmal acid-extrusion mechanisms. A steady state (plateau acidosis) is attained when both fluxes are of equal magnitude.

An unexpected observation made in the present work was that, in sharp contrast to the conclusions made by Moser (1985), acid extrusion in the crayfish stretch-receptor neurone is not strictly dependent on the presence of  $\text{Cl}^-$ . This suggests that there is no difference between the receptor neurone and central neurones, which have been shown to employ two separate mechanisms for acid extrusion: a  $\text{Na}^+/\text{H}^+$  exchange and a  $\text{Na}^+$ -dependent  $\text{Cl}^-/\text{HCO}_3^-$  exchange (Moody, 1981).

The observation that acetazolamide decreased the initial rate of the fall in pHi caused both by  $\text{CO}_2/\text{HCO}_3^-$  and by GABA (Fig. 3) clearly indicates that the stretch-receptor neurone contains an intracellular carbonic anhydrase. Immunohistochemical work has recently shown that certain vertebrate neurones contain carbonic anhydrase (Droz and Kazimierzak, 1987; Wong *et al.* 1987; Aldskogius *et al.* 1988) and, on purely structural grounds, it has been postulated that carbonic anhydrase may play a role in synaptic transmission (Aldskogius *et al.* 1988). A catalyzed hydration of  $\text{CO}_2$  will tend to accentuate postsynaptic pHi transients produced by  $\text{HCO}_3^-$  movements across inhibitory channels, and it is possible that such pHi changes may have a modulatory role in synaptic transmission (see Kaila and Voipio, 1990).

Since most of the work on the stretch-receptor neurone has been done under nominally  $\text{HCO}_3^-$ -free conditions (Kuffler and Eyzaguirre, 1955; Ozawa and Tsuda, 1973; Deisz and Lux, 1982), the demonstration of a significant  $\text{HCO}_3^-$  permeability of the inhibitory channels does not necessitate major revisions of the conclusions made in previous work on the effects of GABA on membrane potential. However, under conditions *in vivo*, a  $\text{HCO}_3^-$  permeability is bound to lead to a marked difference between  $E_{\text{Cl}}$  and the reversal potential of the inhibitory postsynaptic potential IPSP ( $E_{\text{IPSP}}$ ), especially when the  $\text{HCO}_3^-$  concentration of the haemolymph is high (see Gaillard and Malan, 1983).

This work was supported by grants from the Academy of Finland, from the Swedish Medical Research Council (6838) and from the Magnus Bergwall Foundation.

### References

- AICKIN, C. C., DEISZ, R. A. AND LUX, H. D. (1981). On the action of the anticonvulsant 5,5-diphenylhydantoin and the convulsant picrotoxin in crayfish stretch receptor. *J. Physiol., Lond.* **315**, 157–173.
- ALDSKOGIUS, H., ARVIDSSON, J. AND HANSSON, P. (1988). Carbonic anhydrase enzyme histochemistry of cranial nerve primary sensory afferent neurons in the rat. *Histochemistry* **88**, 151–154.

- ATWOOD, H. L. (1982). Synapses and neurotransmitters. In *The Biology of Crustacea* (ed. H. L. Atwood and D. C. Sandeman), pp. 105–150. New York: Academic Press.
- BOISTEL, J. AND FATT, P. (1958). Membrane permeability change during inhibitory transmitter action in crustacean muscle. *J. Physiol., Lond.* **144**, 176–191.
- BORMANN, J., HAMILL, O. P. AND SAKMANN, B. (1987). Mechanism of anion permeation through channels gated by glycine and  $\gamma$ -aminobutyric acid in mouse cultured spinal neurones. *J. Physiol., Lond.* **385**, 243–286.
- BROWN, H. M., OTTOSON, D. AND RYDQVIST, B. (1978). Crayfish stretch receptor: an investigation with voltage-clamp and ion-sensitive electrodes. *J. Physiol., Lond.* **284**, 155–179.
- BROWN, P. D., ELLIOTT, A. C. AND LAU, K. R. (1989). Indirect evidence for the presence of non-specific anion channels in rabbit mandibular salivary glands. *J. Physiol., Lond.* **414**, 415–431.
- DEISZ, R. A. AND LUX, H. D. (1982). The role of intracellular chloride in hyperpolarizing post-synaptic inhibition of crayfish stretch receptor neurones. *J. Physiol., Lond.* **326**, 123–138.
- DEUTSCH, H. F. (1987). Carbonic anhydrases. *Int. J. Biochem.* **19**, 101–113.
- DROZ, B. AND KAZIMIERCZAK, J. (1987). Carbonic anhydrase in primary sensory neurons and dorsal root ganglia. *Comp. Biochem. Physiol.* **88B**, 713–717.
- DUDEL, J. AND HATT, H. (1976). Four types of GABA receptors in crayfish leg muscles characterized by desensitization and specific antagonist. *Pflügers Arch.* **364**, 217–222.
- ENDRES, W., BALLANYI, K., SERVE, G. AND GRAFE, P. (1986). Excitatory amino acids and intracellular pH in motoneurons of the isolated frog spinal cord. *Neurosci. Lett.* **72**, 54–58.
- GAILLARD, S. AND MALAN, A. (1983). Intracellular pH regulation in response to ambient hyperoxia or hypercapnia in the crayfish. *Molec. Physiol.* **4**, 231–243.
- INOMATA, N., OOMURA, Y., AKAIKE, N. AND EDWARDS, C. (1986). The anion selectivity of the  $\gamma$ -aminobutyric acid controlled chloride channel in the perfused spinal ganglion cell of frog. *J. Neurosci. Res.* **3**, 371–383.
- KAILA, K., MATTSSON, K. AND VOIPIO, J. (1989a). Fall in intracellular pH and increase in resting tension induced by a mitochondrial uncoupling agent in crayfish muscle. *J. Physiol., Lond.* **408**, 271–293.
- KAILA, K., PASTERNAK, M., SAARIKOSKI, J. AND VOIPIO, J. (1989b). Influence of GABA-gated bicarbonate conductance on membrane potential, current and intracellular chloride in crayfish muscle fibres. *J. Physiol., Lond.* **416**, 161–181.
- KAILA, K., SAARIKOSKI, J. AND VOIPIO, J. (1990). Mechanism of action of GABA on intracellular pH and on surface pH in crayfish muscle fibres. *J. Physiol., Lond.* **427**, 241–260.
- KAILA, K. AND VOIPIO, J. (1985). A simple method for dry bevelling of micropipettes used in the construction of ion-selective microelectrodes. *J. Physiol., Lond.* **369**, 8P.
- KAILA, K. AND VOIPIO, J. (1987). Postsynaptic fall in intracellular pH induced by GABA-activated bicarbonate conductance. *Nature* **330**, 163–165.
- KAILA, K. AND VOIPIO, J. (1990). GABA-activated bicarbonate conductance: influence on  $E_{GABA}$  and on postsynaptic pH regulation. In *Chloride Channels and Carriers in Nerve, Muscle and Glial Cells* (ed. F. J. Alvarez-Leefmans and J. M. Russell), pp. 331–353. New York: Plenum Press.
- KELLY, J. S., KRNEVIĆ, K., MORRIS, M. E. AND YIM, G. K. W. (1969). Anionic permeability of cortical neurones. *Expl Brain Res.* **7**, 11–31.
- KUFFLER, S. W. AND EDWARDS, C. (1958). Mechanism of gamma aminobutyric acid (GABA) action and its relation to synaptic inhibition. *J. Neurophysiol.* **21**, 589–610.
- KUFFLER, S. W. AND EYZAGUIRRE, C. (1955). Synaptic inhibition in an isolated nerve cell. *J. gen. Physiol.* **39**, 155–184.
- LEVITAN, E. S., SCHOFIELD, P. R., BURT, D. R., RHEES, L. M., WISDEN, W., KÖHLER, M., FUJITA, N., RODRIGUEZ, H. F., STEPHENSON, A., DARLISON, M. G., BARNARD, E. A. AND SEEBURG, P. H. (1988). Structural and functional basis for GABA<sub>A</sub> receptor heterogeneity. *Nature* **335**, 76–79.
- MARDER, E. AND PAUPARDIN-TRITSCH, D. (1978). The pharmacological properties of some crustacean neuronal acetylcholine,  $\gamma$ -aminobutyric acid, and L-glutamate responses. *J. Physiol., Lond.* **280**, 213–236.
- MAREN, T. H. (1967). Carbonic anhydrase: chemistry, physiology and inhibition. *Physiol. Rev.* **47**, 595–781.

- MELVIN, J. E., MORAN, A. AND TURNER, R. J. (1988). The role of  $\text{HCO}_3^-$  and  $\text{Na}^+/\text{H}^+$  exchange in the response of rat parotid acinar gland cells to muscarinic stimulation. *J. biol. Chem.* **263**, 19 564–19 569.
- MOODY, W., JR (1981). The ionic mechanism of intracellular pH regulation in crayfish neurones. *J. Physiol., Lond.* **316**, 293–308.
- MOSER, H. (1985). Intracellular pH regulation in the sensory neurone of the stretch receptor of the crayfish (*Astacus fluviatilis*). *J. Physiol., Lond.* **362**, 23–38.
- OZAWA, S. AND TSUDA, K. (1973). Membrane permeability change during inhibitory transmitter action in crayfish stretch receptor cell. *J. Neurophysiol.* **36**, 805–816.
- ROBERTS, E. (1986). GABA: the road to neurotransmitter status. In *Benzodiazepine/GABA Receptors and Chloride Channels: Structural and Functional Properties* (ed. R. W. Olsen and J. C. Venter), pp. 1–39. New York: Alan R. Liss.
- ROOS, A. AND BORON, W. F. (1981). Intracellular pH. *Physiol. Rev.* **61**, 296–433.
- SIGGINS, G. R. AND GRUOL, D. L. (1986). Mechanisms of transmitter action in the vertebrate central nervous system. In *Handbook of Physiology*, section I, *The Nervous System*, vol. IV (ed. F. E. Bloom), pp. 1–114. Bethesda, Maryland: American Physiological Society.
- SZATKOWSKI, M. AND THOMAS, R. C. (1989). The intrinsic intracellular  $\text{H}^+$  buffering power of snail neurones. *J. Physiol., Lond.* **409**, 89–101.
- TAKEUCHI, A. AND TAKEUCHI, N. (1967). Anion permeability of the inhibitory post-synaptic membrane of the crayfish neuromuscular junction. *J. Physiol., Lond.* **191**, 575–590.
- TAKEUCHI, A. AND TAKEUCHI, N. (1969). A study of the action of picrotoxin on the inhibitory neuromuscular junction of the crayfish. *J. Physiol., Lond.* **205**, 377–391.
- TAUC, L. AND GERSCHENFELD, H. M. (1962). A cholinergic mechanism of inhibitory synaptic transmission in a molluscan nervous system. *J. Neurophysiol.* **25**, 236–262.
- THOMAS, R. C. (1977). The role of bicarbonate, chloride and sodium ions in the regulation of intracellular pH in snail neurones. *J. Physiol., Lond.* **273**, 317–338.
- THOMAS, R. C. (1984). Experimental displacement of intracellular pH and the mechanism of its subsequent recovery. *J. Physiol., Lond.* **354**, 3P–22P.
- WONG, V., BARRETT, C. P., DONATI, E. J. AND GUTH, L. (1987). Distribution of carbonic anhydrase activity in neurons of the rat. *J. comp. Neurol.* **257**, 122–129.
- YASUI, S., ISHIZUKA, S. AND AKAIKE, N. (1985). GABA activates different types of chloride-conducting receptor-ionophore complexes in a dose-dependent manner. *Brain Res.* **344**, 176–180.
